# Supplementary material
Source: publisher figshare collection journal article supplement (https://tandf.figshare.com/articles/dataset/_/6171593)
Supplement: Supplementary file 1 [file 1]

Running head: SUPPLEMENTAL MATERIAL

Supplemental Material

Han Du

University of California, Los Angeles

Lijuan Wang

University of Notre Dame

Correspondence should be addressed to Han Du, 1285 Franz Hall, Box 951563, Los Angeles, CA  
90095-1563.
